# Supplementary material
Source: PubMed Central journal article supplement (PMC3969879)
Supplement: NIHMS532997-supplement-125_2013_3080_MOESM1_ESM.pdf [file NIHMS532997-supplement-125_2013_3080_MOESM1_ESM.pdf]

**ESM Table 1** Characteristics in non-diabetic participants at baseline who were included in the analyses and those who were excluded

|                                                                                                           | Not included       | Included           | p value |
|-----------------------------------------------------------------------------------------------------------|--------------------|--------------------|---------|
| n                                                                                                         | 198                | 866                | -       |
| Age (years) <sup>a</sup>                                                                                  | 55.8 ± 0.6         | 54.6 ± 0.3         | 0.082   |
| Female (%) <sup>a</sup>                                                                                   | 55.0 (48.1 – 61.8) | 57.0 (53.7 – 60.3) | 0.608   |
| Ethnicity (%) <sup>a</sup>                                                                                |                    |                    |         |
| African American                                                                                          | 26.3 (20.6 – 32.8) | 25.6 (22.8 – 28.6) | 0.855   |
| Hispanic                                                                                                  | 32.3 (26.2 – 39.1) | 34.6 (31.5 – 37.9) | 0.535   |
| Non-Hispanic white                                                                                        | 41.4 (34.8 – 48.4) | 39.7 (36.5 – 43.0) | 0.660   |
| BMI (kg/m <sup>2</sup> )                                                                                  | 29.0 ± 0.4         | 28.4 ± 0.2         | 0.196   |
| Waist circumference (cm)                                                                                  | 91.8 ± 0.9         | 90.2 ± 0.4         | 0.110   |
| Fasting glucose (mmol/l)                                                                                  | 5.48 ± 0.04        | 5.45 ± 0.19        | 0.439   |
| 2-h glucose (mmol/l)                                                                                      | 7.02 ± 1.33        | 6.88 ± 0.64        | 0.336   |
| Fasting insulin (pmol/l) <sup>b</sup>                                                                     | 82.4 ± 3.4         | 76.1 ± 1.5         | 0.125   |
| HOMA-IR <sup>b</sup>                                                                                      | 3.32 ± 0.17        | 3.06 ± 0.06        | 0.123   |
| S <sub>I</sub> (×10 <sup>-5</sup> min <sup>-1</sup> . pmol <sup>-1</sup> . l <sup>-1</sup> ) <sup>b</sup> | 2.65 ± 0.18        | 2.92 ± 0.09        | 0.125   |
| AIR (pmol/l) <sup>b</sup>                                                                                 | 305.4 ± 18.9       | 302.4 ± 9.2        | 0.820   |
| Proinsulin-to-insulin ratio (x100) <sup>b</sup>                                                           | 6.3 ± 0.9          | 6.2 ± 0.1          | 0.993   |
| hsCRP (mg/l) <sup>b,c</sup>                                                                               | 2.00 ± 0.17        | 1.70 ± 0.07        | 0.081   |
| Smoking (%) <sup>a</sup>                                                                                  |                    |                    | <0.001  |
| Never                                                                                                     | 38.8 (32.2 – 45.8) | 46.8 (43.5 – 50.1) | 0.043   |
| Past                                                                                                      | 35.2 (28.8 – 42.1) | 38.8 (35.6 – 42.1) | 0.350   |
| Current                                                                                                   | 26.0 (20.4 – 32.6) | 14.4 (12.2 – 16.9) | <0.001  |
| Number of cigarettes <sup>b,d</sup>                                                                       | 12.7 ± 1.6         | 11.5 ± 0.8         | 0.459   |
| White-cells (× 10 <sup>9</sup> /L) <sup>b</sup>                                                           | 5.87 ± 0.12        | 5.42 ± 0.05        | 0.002   |
| Neutrophils (× 10 <sup>9</sup> /L) <sup>b</sup>                                                           | 3.43 ± 0.10        | 3.13 ± 0.03        | 0.010   |
| Lymphocytes (× 10 <sup>9</sup> /L) <sup>b</sup>                                                           | 1.72 ± 0.03        | 1.67 ± 0.02        | 0.221   |
| Monocytes (× 10 <sup>9</sup> /L) <sup>b</sup>                                                             | 0.34 ± 0.01        | 0.30 ± 0.01        | 0.001   |
| Neutrophil-to-lymphocyte ratio <sup>c</sup>                                                               | 1.097 ± 0.004      | 1.090 ± 0.002      | 0.216   |
| Neutrophils (%)                                                                                           | 59.5 ± 0.7         | 59.4 ± 0.3         | 0.972   |
| Lymphocytes (%)                                                                                           | 30.4 ± 0.6         | 31.5 ± 0.3         | 0.090   |

|                                   |             |             |       |
|-----------------------------------|-------------|-------------|-------|
| Monocytes (%)                     | 6.4 ± 0.2   | 6.0 ± 0.1   | 0.102 |
| Neutrophils (%) / lymphocytes (%) | 2.22 ± 0.08 | 2.14 ± 0.04 | 0.370 |

Data are n, mean ± SEM, or rates and 95% CI

Results adjusted for age, sex, race/ethnicity, and clinic

<sup>a</sup> Non-adjusted values

<sup>b</sup> Log<sub>e</sub>-transformed values then back transformed for presentation

<sup>c</sup> Log<sub>e</sub>-transformed neutrophils / log<sub>e</sub>-transformed lymphocytes

<sup>c</sup> To convert hsCRP to nanomoles per liter, multiply by 9.524

<sup>d</sup> Cigarettes smoked per day among current smokers

HOMA-IR indicates homeostasis model assessment of insulin resistance; S<sub>i</sub>, insulin sensitivity index;

AIR, acute insulin response; hsCRP, high-sensitivity C-reactive protein

Neutrophil-to-lymphocyte ratio = log<sub>e</sub>-transformed neutrophil count / log<sub>e</sub>-transformed lymphocyte count
