# Supplementary material
Source: PubMed Central journal article supplement (PMC3969879)
Supplement: NIHMS532997-supplement-125_2013_3080_MOESM2_ESM.pdf [file NIHMS532997-supplement-125_2013_3080_MOESM2_ESM.pdf]

**ESM Table 2** White cell counts by inclusion and exclusion status after controlling for cigarette smoking

|                                              | Not included      | Included          | p value |
|----------------------------------------------|-------------------|-------------------|---------|
| n                                            | 198               | 866               | -       |
| White cells ( $\times 10^9/L$ ) <sup>a</sup> | 5.70 $\pm$ 0.11   | 5.53 $\pm$ 0.06   | 0.187   |
| Neutrophils ( $\times 10^9/L$ ) <sup>a</sup> | 3.33 $\pm$ 0.10   | 3.23 $\pm$ 0.03   | 0.444   |
| Lymphocytes ( $\times 10^9/L$ ) <sup>a</sup> | 1.66 $\pm$ 0.04   | 1.67 $\pm$ 0.02   | 0.867   |
| Monocytes ( $\times 10^9/L$ ) <sup>a</sup>   | 0.33 $\pm$ 0.01   | 0.30 $\pm$ 0.01   | 0.012   |
| Neutrophil-to-lymphocyte ratio <sup>a</sup>  | 1.095 $\pm$ 0.005 | 1.090 $\pm$ 0.002 | 0.367   |

Data are n or mean  $\pm$  SEM

All results adjusted for age, sex, race/ethnicity, and clinic

<sup>a</sup> Results adjusted for log<sub>e</sub>-transformed the number of cigarettes currently smoked per day.
