# Supplementary material
Source: PubMed Central journal article supplement (PMC3969879)
Supplement: NIHMS532997-supplement-125_2013_3080_MOESM3_ESM.pdf [file NIHMS532997-supplement-125_2013_3080_MOESM3_ESM.pdf]

**ESM Table 3** Correlation between total white cell count, count of each type of white blood cell, and selected metabolic risk factors at baseline

|                                              | Log <sub>e</sub> white-cell count | Log <sub>e</sub> neutrophil count | Log <sub>e</sub> lymphocyte count | Log <sub>e</sub> monocyte count | Neutrophil-to-lymphocyte ratio |
|----------------------------------------------|-----------------------------------|-----------------------------------|-----------------------------------|---------------------------------|--------------------------------|
| Log <sub>e</sub> neutrophil count            | 0.89 ***                          | -                                 | -                                 | -                               | -                              |
| Log <sub>e</sub> lymphocyte count            | 0.54 ***                          | 0.23 ***                          | -                                 | -                               | -                              |
| Log <sub>e</sub> monocyte count              | 0.46 ***                          | 0.36 ***                          | 0.15 ***                          | -                               | -                              |
| Neutrophil-to-lymphocyte ratio               | 0.38 ***                          | 0.69 ***                          | - 0.54 ***                        | 0.20 ***                        | -                              |
| Fasting glucose                              | 0.05                              | 0.01                              | 0.08 *                            | 0.00                            | - 0.05                         |
| 2-h glucose                                  | 0.17 ***                          | 0.17 ***                          | 0.14 ***                          | 0.04                            | 0.04                           |
| BMI                                          | 0.17 ***                          | 0.12 ***                          | 0.20 ***                          | 0.05                            | - 0.05                         |
| Waist circumference                          | 0.15 ***                          | 0.11 **                           | 0.15 ***                          | 0.08 **                         | - 0.01                         |
| Log <sub>e</sub> fasting insulin             | 0.21 ***                          | 0.13 ***                          | 0.24 ***                          | 0.10 **                         | - 0.07                         |
| Log <sub>e</sub> HOMA-IR                     | 0.21 ***                          | 0.13 ***                          | 0.24 ***                          | 0.10 **                         | - 0.07 *                       |
| Log <sub>e</sub> S <sub>I</sub>              | - 0.22 ***                        | - 0.16 ***                        | - 0.24 ***                        | - 0.07 *                        | 0.04                           |
| Log <sub>e</sub> AIR                         | 0.12 ***                          | 0.09 **                           | 0.16 ***                          | 0.08 *                          | - 0.04                         |
| Log <sub>e</sub> AIR §                       | 0.05                              | 0.03                              | 0.09 *                            | 0.06                            | - 0.03                         |
| Log <sub>e</sub> proinsulin-to-insulin ratio | - 0.04                            | - 0.01                            | - 0.06                            | - 0.02                          | 0.04                           |
| Log <sub>e</sub> hsCRP                       | 0.29 ***                          | 0.25 ***                          | 0.17 ***                          | 0.11**                          | 0.09 *                         |

\* p <0.05; \*\* p <0.01; \*\*\* p <0.001

§ Pearson's partial correlation coefficient adjusting for log S<sub>I</sub>
