# Supplementary material
Source: PubMed Central journal article supplement (PMC3969879)
Supplement: NIHMS532997-supplement-125_2013_3080_MOESM4_ESM.pdf [file NIHMS532997-supplement-125_2013_3080_MOESM4_ESM.pdf]

**ESM Table 4** Risk of developing diabetes associated with total and differential white-cell type counts

|                  | Adjustment model                                                 | Lower tertile | Middle tertile    | Upper tertile     | p for trend |
|------------------|------------------------------------------------------------------|---------------|-------------------|-------------------|-------------|
| White-cell count |                                                                  |               |                   |                   |             |
| Model 1          | Demographics (age, sex, ethnicity, and clinic)                   | 1.00          | 1.70 (1.06, 2.74) | 1.80 (1.10, 2.92) | 0.020       |
| Model 2          | Demographics + family history + fasting glucose                  | 1.00          | 1.61 (0.96, 2.70) | 1.52 (0.89, 2.59) | 0.141       |
| Model 3          | Demographics + family history + fasting glucose + smoking        | 1.00          | 1.44 (0.86, 2.44) | 1.15 (0.66, 2.02) | 0.683       |
| Model 4          | Model 3 + BMI                                                    | 1.00          | 1.34 (0.79, 2.28) | 1.01 (0.57, 1.79) | 0.950       |
| Model 5          | Model 3 + 2-h glucose                                            | 1.00          | 1.19 (0.69, 2.06) | 0.80 (0.44, 1.44) | 0.394       |
| Model 6          | Model 3 + log <sub>e</sub> fasting insulin                       | 1.00          | 1.36 (0.80, 2.32) | 0.93 (0.52, 1.66) | 0.728       |
| Model 7          | Model 3 + log <sub>e</sub> HOMA-IR                               | 1.00          | 1.36 (0.80, 2.32) | 0.93 (0.52, 1.66) | 0.726       |
| Model 8          | Model 3 + log <sub>e</sub> S <sub>I</sub>                        | 1.00          | 1.08 (0.62, 1.89) | 0.77 (0.42, 1.43) | 0.363       |
| Model 9          | Model 3 + log <sub>e</sub> AIR                                   | 1.00          | 1.40 (0.81, 2.42) | 1.30 (0.73, 2.31) | 0.411       |
| Model 10         | Model 3 + log <sub>e</sub> S <sub>I</sub> + log <sub>e</sub> AIR | 1.00          | 1.00 (0.56, 1.77) | 0.77 (0.42, 1.44) | 0.386       |
| Model 11         | Model 3 + log <sub>e</sub> hsCRP                                 | 1.00          | 1.34 (0.78, 2.29) | 0.96 (0.53, 1.71) | 0.787       |
| Neutrophil count |                                                                  |               |                   |                   |             |
| Model 1          | Demographics (age, sex, ethnicity, and clinic)                   | 1.00          | 1.42 (0.87, 2.30) | 1.67 (1.04, 2.71) | 0.037       |
| Model 2          | Demographics + family history + fasting glucose                  | 1.00          | 1.30 (0.76, 2.21) | 1.51 (0.89, 2.56) | 0.127       |
| Model 3          | Demographics + family history + fasting glucose + smoking        | 1.00          | 1.18 (0.69, 2.02) | 1.17 (0.67, 2.03) | 0.607       |
| Model 4          | Model 3 + BMI                                                    | 1.00          | 1.11 (0.64, 1.91) | 1.05 (0.60, 1.85) | 0.885       |
| Model 5          | Model 3 + 2-h glucose                                            | 1.00          | 1.05 (0.60, 1.85) | 0.89 (0.50, 1.60) | 0.664       |
| Model 6          | Model 3 + log <sub>e</sub> fasting insulin                       | 1.00          | 1.12 (0.65, 1.94) | 1.01 (0.58, 1.78) | 0.997       |
| Model 7          | Model 3 + log <sub>e</sub> HOMA-IR                               | 1.00          | 1.12 (0.65, 1.94) | 1.01 (0.58, 1.78) | 0.999       |
| Model 8          | Model 3 + log <sub>e</sub> S <sub>I</sub>                        | 1.00          | 0.98 (0.55, 1.73) | 0.91 (0.50, 1.65) | 0.744       |
| Model 9          | Model 3 + log <sub>e</sub> AIR                                   | 1.00          | 1.16 (0.66, 2.02) | 1.31 (0.74, 2.32) | 0.357       |
| Model 10         | Model 3 + log <sub>e</sub> S <sub>I</sub> + log <sub>e</sub> AIR | 1.00          | 0.90 (0.50, 1.63) | 0.87 (0.47, 1.60) | 0.664       |

|                  |                                                                  |      |                   |                   |        |
|------------------|------------------------------------------------------------------|------|-------------------|-------------------|--------|
| Model 11         | Model 3 + log <sub>e</sub> hsCRP                                 | 1.00 | 1.15 (0.66, 1.98) | 1.04 (0.58, 1.84) | 0.941  |
| Lymphocyte count |                                                                  |      |                   |                   |        |
| Model 1          | Demographics (age, sex, ethnicity, and clinic)                   | 1.00 | 1.73 (1.06, 2.83) | 2.30 (1.41, 3.76) | <0.001 |
| Model 2          | Demographics + family history + fasting glucose                  | 1.00 | 1.71 (1.00, 2.93) | 2.20 (1.29, 3.76) | 0.004  |
| Model 3          | Demographics + family history + fasting glucose + smoking        | 1.00 | 1.54 (0.89, 2.66) | 1.96 (1.13, 3.37) | 0.017  |
| Model 4          | Model 3 + BMI                                                    | 1.00 | 1.59 (0.92, 2.75) | 1.88 (1.08, 3.25) | 0.028  |
| Model 5          | Model 3 + 2-h glucose                                            | 1.00 | 1.44 (0.81, 2.56) | 1.64 (0.92, 2.91) | 0.098  |
| Model 6          | Model 3 + log <sub>e</sub> fasting insulin                       | 1.00 | 1.54 (0.88, 2.67) | 1.69 (0.97, 2.96) | 0.074  |
| Model 7          | Model 3 + log <sub>e</sub> HOMA-IR                               | 1.00 | 1.54 (0.88, 2.67) | 1.69 (0.97, 2.96) | 0.074  |
| Model 8          | Model 3 + log <sub>e</sub> S <sub>I</sub>                        | 1.00 | 1.38 (0.78, 2.45) | 1.44 (0.80, 2.58) | 0.242  |
| Model 9          | Model 3 + log <sub>e</sub> AIR                                   | 1.00 | 1.53 (0.88, 2.69) | 2.02 (1.15, 3.56) | 0.014  |
| Model 10         | Model 3 + log <sub>e</sub> S <sub>I</sub> + log <sub>e</sub> AIR | 1.00 | 1.31 (0.73, 2.35) | 1.47 (0.81, 2.67) | 0.214  |
| Model 11         | Model 3 + log <sub>e</sub> hsCRP                                 | 1.00 | 1.62 (0.93, 2.82) | 1.89 (1.08, 3.30) | 0.028  |
| Monocyte count   |                                                                  |      |                   |                   |        |
| Model 1          | Demographics (age, sex, ethnicity, and clinic)                   | 1.00 | 1.26 (0.79, 2.01) | 1.18 (0.73, 1.90) | 0.506  |
| Model 2          | Demographics + family history + fasting glucose                  | 1.00 | 1.34 (0.80, 2.23) | 1.27 (0.76, 2.12) | 0.382  |
| Model 3          | Demographics + family history + fasting glucose + smoking        | 1.00 | 1.32 (0.79, 2.22) | 1.13 (0.67, 1.92) | 0.671  |
| Model 4          | Model 3 + BMI                                                    | 1.00 | 1.28 (0.76, 2.16) | 1.08 (0.64, 1.84) | 0.800  |
| Model 5          | Model 3 + 2-h glucose                                            | 1.00 | 1.27 (0.74, 2.19) | 0.96 (0.55, 1.68) | 0.836  |
| Model 6          | Model 3 + log <sub>e</sub> fasting insulin                       | 1.00 | 1.24 (0.74, 2.10) | 0.98 (0.58, 1.68) | 0.910  |
| Model 7          | Model 3 + log <sub>e</sub> HOMA-IR                               | 1.00 | 1.24 (0.74, 2.10) | 0.98 (0.58, 1.68) | 0.907  |
| Model 8          | Model 3 + log <sub>e</sub> S <sub>I</sub>                        | 1.00 | 1.04 (0.60, 1.81) | 0.94 (0.54, 1.64) | 0.825  |
| Model 9          | Model 3 + log <sub>e</sub> AIR                                   | 1.00 | 1.27 (0.74, 2.18) | 1.18 (0.69, 2.03) | 0.560  |
| Model 10         | Model 3 + log <sub>e</sub> S <sub>I</sub> + log <sub>e</sub> AIR | 1.00 | 1.17 (0.66, 2.06) | 1.04 (0.59, 1.82) | 0.925  |
| Model 11         | Model 3 + log <sub>e</sub> hsCRP                                 | 1.00 | 1.23 (0.73, 2.09) | 1.03 (0.61, 1.75) | 0.952  |

| Neutrophil-to-lymphocyte ratio |                                                                  |      |                   |                   |       |
|--------------------------------|------------------------------------------------------------------|------|-------------------|-------------------|-------|
| Model 1                        | Demographics (age, sex, ethnicity, and clinic)                   | 1.00 | 1.29 (0.81, 2.03) | 0.89 (0.55, 1.45) | 0.618 |
| Model 2                        | Demographics + family history + fasting glucose                  | 1.00 | 1.21 (0.74, 1.98) | 0.85 (0.50, 1.45) | 0.540 |
| Model 3                        | Demographics + family history + fasting glucose + smoking        | 1.00 | 1.15 (0.70, 1.89) | 0.74 (0.43, 1.27) | 0.257 |
| Model 4                        | Model 3 + BMI                                                    | 1.00 | 1.16 (0.70, 1.92) | 0.71 (0.41, 1.24) | 0.221 |
| Model 5                        | Model 3 + 2-h glucose                                            | 1.00 | 0.95 (0.56, 1.60) | 0.60 (0.34, 1.07) | 0.078 |
| Model 6                        | Model 3 + log <sub>e</sub> fasting insulin                       | 1.00 | 1.14 (0.69, 1.88) | 0.73 (0.42, 1.26) | 0.248 |
| Model 7                        | Model 3 + log <sub>e</sub> HOMA-IR                               | 1.00 | 1.14 (0.69, 1.88) | 0.73 (0.42, 1.26) | 0.247 |
| Model 8                        | Model 3 + log <sub>e</sub> S <sub>I</sub>                        | 1.00 | 1.06 (0.62, 1.82) | 0.76 (0.43, 1.35) | 0.330 |
| Model 9                        | Model 3 + log <sub>e</sub> AIR                                   | 1.00 | 1.13 (0.67, 1.90) | 0.80 (0.46, 1.40) | 0.401 |
| Model 10                       | Model 3 + log <sub>e</sub> S <sub>I</sub> + log <sub>e</sub> AIR | 1.00 | 0.96 (0.55, 1.66) | 0.73 (0.40, 1.31) | 0.272 |
| Model 11                       | Model 3 + log <sub>e</sub> hsCRP                                 | 1.00 | 1.05 (0.63, 1.75) | 0.67 (0.39, 1.17) | 0.149 |

OR and 95% CI expressed per 1 SD unit increase

Range for total and differential white-cell count tertiles ( $\times 10^9/L$ ): white-cell count lower 2.1 – 4.9, middle 5 – 6.2, and upper tertiles 6.3 – 15.4; neutrophil count lower 0.41 – 2.82, middle 2.83 – 3.80, and upper tertiles 3.81 – 11.5; lymphocyte count lower 0.55 – 1.47, middle 1.48 – 1.92, and upper tertiles 1.93 – 4.18; monocyte count lower 0 – 0.26, middle 0.27 – 0.36, and upper tertiles 0.37 – 1.13. Range for neutrophil-to-lymphocyte ratio tertiles: lower 0.78 – 1.06, middle 1.07 – 1.11, and upper tertiles 1.12 – 1.42.

Family history indicates family history of diabetes; smoking was expressed as log<sub>e</sub> of the number of cigarettes currently smoked per day
